# Supplementary material
Source: PubMed Central journal article supplement (PMC3985337)
Supplement: NIHMS566232-supplement-Supplementary_Data.pdf [file NIHMS566232-supplement-Supplementary_Data.pdf]

Supporting Information

© Wiley-VCH 2014

69451 Weinheim, Germany

**Fourier Transform EPR Spectroscopy of Trityl Radicals for  
Multifunctional Assessment of Chemical Microenvironment\*\***

*Andrey A. Bobko, Ilirian Dhimitruka, Jay L. Zweier, and Valery V. Khramtsov\**

anie\_201310841\_sm\_miscellaneous\_information.pdf

# Supporting Information

## *Table of content*

|                                     |              |
|-------------------------------------|--------------|
| <b>1) Materials and methods</b>     | <b>p. S2</b> |
| <b>2) FT-EPR spectra simulation</b> | <b>p. S3</b> |
| <b>3) Figure SI3</b>                | <b>p. S7</b> |
| <b>4) References</b>                | <b>p. S8</b> |

## ***Materials and Methods***

**Synthesis.** The monophosphonated trityl probe, p<sub>1</sub>TAM (Scheme 1, main manuscript) was synthesized as previously described<sup>[1]</sup>.

**pH titration.** Radical solutions (200 μM) in the presence of 150 mM of NaCl and various concentration of phosphate buffer were titrated by addition of a small volume of NaOH or HCl with the final dilution of sample less than 1%. Anoxic conditions were maintained using gas controller (Noxygen, Germany) or by addition of 10 mM glucose and glucose oxidase (Sigma, USA, 100 U/ml).

**Pulse X-band EPR studies.** Measurements were performed on X-band ELEXSYS E 580 EPR spectrometer (Bruker, Germany) at room temperature, 22 °C. Gas composition was controlled by a gas controller (Noxygen, Germany) using teflon tubes with a diameter of 1.14 mm and wall thickness of 60 μm (Zeus, Inc., USA).

### **T<sub>1</sub> and T<sub>2</sub> relaxation time measurements.**

T<sub>2</sub> relaxation times of low-field component of p<sub>1</sub>TAM spectrum were measured by using the simple Hahn echo sequence: p0 – tau – p1 – tau – echo. Typical instrument setting were as follows: TWT microwave power, 18 dB; video bandwidth, 20 MHz; time base, 20 ns; 16-step phase cycling; π/2 pulse (p0), 96ns; π pulse (p1), 192 ns; initial tau value, 400 ns, integration time pg, 800 ns. Acquired decay kinetics was fitted by exponent to find a T<sub>2</sub> values.

T<sub>1</sub> relaxation times of low-field component of p<sub>1</sub>TAM spectrum were measured by using the inversion recovery pulse sequence (p2 – d2 – p0 – tau – p1 – tau – echo). Typical instrument setting were as follows: TWT microwave power, 18 dB; video bandwidth, 20 MHz; time base, 20 ns; 4-step phase cycling; π/2 pulse (p0), 96ns; π pulse (p1), 192 ns; inversion pulse (p2), 180 ns; initial tau value, 500 ns, d2 delay time, 500 ns; integration time pg, 800 ns. Acquired decay kinetics was fitted by stretched exponent to find a T<sub>1</sub> values.

### **Fourier Transform EPR signal detection and processing.**

EPR signal of p<sub>1</sub>TAM probe was acquired in the form of free induction decay (FID) using two different settings: (i) non-selective 20 ns π/2 pulse for allowing for excitation of the whole spectrum, and (ii) selective 96 ns π/2 pulse for selective excitation of low-field spectral component. Typical instrument setting were as follows: TWT microwave power, 18 dB (96 ns pulse) or 3 dB (20 ns pulse); video bandwidth, 20 MHz. Signal acquisition parameters: detection time, 4096 points x 20 ns time base = 81.92 μs; number of transient averages, a = 500; phase cycling, 4-step phase cycle; number of averages, n = 20.

Acquired FID signal was reconstructed to remove dead-time gap using linear prediction fitting program embedded in X-Epr software (Bruker, Germany). The resulted FIDs were zero-filled up to 16384 points, FT-processed, baseline- and phase-corrected.

## ***FT-EPR spectra simulation.***

### ***Simulation of spectra acquired with non-selective 20 ns $\pi/2$ pulse microwave pulse.***

Whole FT EPR spectrum of  $p_1\text{TAM}$  obtained after non-selective  $\pi/2$  pulse is characterized by a doublet for  $p_1\text{TAM}^{3-}$  form (for pH below dissociation constant of phosphono group,  $\text{pH} \ll \text{pK}_a$ ) and  $p_1\text{TAM}^{4-}$  form ( $\text{pH} \gg \text{pK}_a$ ) or by quartet at  $\text{pH} \sim \text{pK}_a$  when both ionization states are present (see Fig. 1, main manuscript). These spectra were simulated using theory of exchange between several sites in non-coupled or loosely coupled systems, adopted from ref.<sup>[2]</sup>. Briefly, FT EPR absorption signal  $V$  was described as follows:

$$V(\nu) = \text{Re} \mathbf{I} \mathbf{K}^{-1} \mathbf{P} \quad (1)$$

$$\mathbf{K} = \mathbf{D} - \mathbf{R} - i(\boldsymbol{\Omega} - \nu \mathbf{I}) \quad (2)$$

where

$$\mathbf{I} = \begin{pmatrix} 1 \\ 1 \\ 1 \\ 1 \end{pmatrix}; \quad \mathbf{P} = \begin{pmatrix} p_A \\ p_B \\ p_B \\ p_A \end{pmatrix}; \quad \mathbf{I} = \begin{pmatrix} 1 & 0 & 0 & 0 \\ 0 & 1 & 0 & 0 \\ 0 & 0 & 1 & 0 \\ 0 & 0 & 0 & 1 \end{pmatrix}; \quad \boldsymbol{\Omega} = \begin{pmatrix} \nu_1 & 0 & 0 & 0 \\ 0 & \nu_2 & 0 & 0 \\ 0 & 0 & \nu_3 & 0 \\ 0 & 0 & 0 & \nu_4 \end{pmatrix};$$

$$\mathbf{R} = \begin{pmatrix} 1/T_A + R_{O_2}^A & 0 & 0 & 0 \\ 0 & 1/T_B + R_{O_2}^B & 0 & 0 \\ 0 & 0 & 1/T_B + R_{O_2}^B & 0 \\ 0 & 0 & 0 & 1/T_A + R_{O_2}^A \end{pmatrix}; \quad \mathbf{D} = \begin{pmatrix} r_1 & r_{21} & r_{31} & r_{41} \\ r_{12} & r_2 & r_{32} & r_{42} \\ r_{13} & r_{23} & r_3 & r_{43} \\ r_{14} & r_{24} & r_{34} & r_4 \end{pmatrix}$$

where  $p_A$  and  $p_B = (1 - p_A)$  – fraction of  $p_1\text{TAM}^{3-}$  and  $p_1\text{TAM}^{4-}$  forms of  $p_1\text{TAM}$  probe, correspondingly;  $\nu_1 - \nu_4$  are the frequencies of four observed EPR lines, namely,  $\nu_1 = -0.5 \times a_p(A) + \nu_0$ , where  $a_p$  is phosphorus hyperfine splitting constant for  $p_1\text{TAM}^{3-}$  ionization state of  $p_1\text{TAM}$  probe (in Hz) and  $\nu_0$  is frequency offset;  $\nu_2 = -0.5 \times a_p(B) + \nu_0 - \Delta g$ , where  $\Delta g$  is difference between resonance positions of  $p_1\text{TAM}^{3-}$  and  $p_1\text{TAM}^{4-}$  forms (in Hz) due to corresponding difference in  $g$ -factors;  $\nu_3 = 0.5 \times a_p(B) + \nu_0 - \Delta g$ ,  $\nu_4 = 0.5 \times a_p(A) + \nu_0$ ;  $T_A$  and  $T_B$  are transverse relaxation times of  $p_1\text{TAM}^{3-}$  and  $p_1\text{TAM}^{4-}$  forms, correspondingly;  $R_{O_2}^A$  and  $R_{O_2}^B$  are the rates of oxygen-induced relaxation (in Hz) for  $p_1\text{TAM}^{3-}$  and  $p_1\text{TAM}^{4-}$  forms, correspondingly.  $\mathbf{D}$  represents frequency exchange matrix where  $r_{ij}$  is the rate of frequency exchange (in Hz) between spectral line  $i$  and  $j$  ( $i, j = 1, 2, 3, 4$ ) where  $r_1 = r_{11} + r_{12} + r_{13} + r_{14}$ ,  $r_2 = r_{21} + r_{22} + r_{23} + r_{24}$ ,  $r_3 = r_{31} + r_{32} + r_{33} + r_{34}$ ,  $r_4 = r_{41} + r_{42} + r_{43} + r_{44}$ . Figure S11 schematically shows  $p_1\text{TAM}$  EPR spectral pattern and various chemical exchange processes that contribute to the values of  $r_{ij}$ .

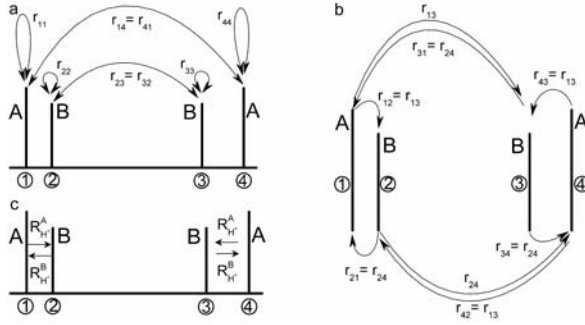

**Figure S11.** The schematic illustration of  $p_1$ TAM EPR spectral pattern and various chemical exchange processes that affect the widths and positions of spectral lines: (a) spin exchange between the  $p_1$ TAM molecules in the same ionization states, A or B; (b) spin exchange between the  $p_1$ TAM molecules in different ionization states; (c) proton exchange between the states A and B.

Both spin exchange and proton exchange reactions contribute to the frequency exchange between the lines with the same phosphorus nucleus spin projections,  $1 \leftrightarrow 2$  and  $3 \leftrightarrow 4$ . The exchange rates between the other lines are determined by the spin exchange only as shown in Figure 7a and 7b, namely:

$$r_{11} = r_{14} = r_{41} = r_{44} = k_{AA} \times p_A \times [p_1\text{TAM}] \quad (3)$$

$$r_{22} = r_{23} = r_{32} = r_{33} = k_{BB} \times (1-p_A) \times [p_1\text{TAM}] \quad (4)$$

$$r_{13} = r_{42} = k_{AB} \times (1-p_A) \times [p_1\text{TAM}] \quad (5)$$

$$r_{24} = r_{31} = k_{AB} \times p_A \times [p_1\text{TAM}] \quad (6)$$

where  $k_{AA}$ ,  $k_{BB}$  and  $k_{AB}$  are the bimolecular rate constants for the spin exchange reaction between the radicals in the same ionization state,  $p_1\text{TAM}^{3-}$  ( $k_{AA}$ ) or  $p_1\text{TAM}^{4-}$  ( $k_{BB}$ ), or between the radicals in different ionization states,  $p_1\text{TAM}^{3-}$  and  $p_1\text{TAM}^{4-}$  ( $k_{AB}$ ).

The four other frequency exchange rates,  $r_{12}$ ,  $r_{21}$ ,  $r_{34}$  and  $r_{43}$ , are determined by both spin exchange and proton exchange reactions, namely:

$$r_{12} = r_{43} = r_{13} + R_{H^+}^A = k_{AB} \times (1-p_A) \times [p_1\text{TAM}] + R_{H^+}^A \quad (7)$$

$$r_{21} = r_{34} = r_{24} + R_{H^+}^B = k_{AB} \times p_A \times [p_1\text{TAM}] + R_{H^+}^B \times p_A / (1-p_A) \quad (8)$$

where  $R_{H^+}^A$  is the rate of proton loss by phosphono group of  $p_1\text{TAM}^{3-}$  form and  $R_{H^+}^B$  is the rate of proton addition to phosphono group of  $p_1\text{TAM}^{4-}$  form. The ratio  $R_{H^+}^A / R_{H^+}^B$  is equal to the ratio of inverse lifetimes of the radical in these forms or the fraction ratio, so  $R_{H^+}^B = R_{H^+}^A \times p_A / (1-p_A)$ . These proton exchange rates may be enhanced in the presence of buffer molecules.

The convolution of function  $V(\nu)$  with Gaussian function was used to take into account the unresolved super hyperfine structure in the EPR spectra of  $p_1$ TAM probe:

$$F(\nu) = C + D \cdot \int V(x) \cdot e^{-\frac{2(\nu-x)^2}{G^2}} \cdot \frac{\sqrt{2}}{\sqrt{\pi} \cdot G} dx \quad (9)$$

where C and D are numerical coefficients; G is linewidth of Gaussian distribution. In general case the spectrum shape,  $F(\nu)$ , is determined by all the discussed parameters: C, D,  $p_A$ ,  $a_p(A)$ ,  $a_p(B)$ ,  $\Delta g$ ,  $T_A$ ,  $T_B$ , G,  $R_{O_2}^A$ ,  $R_{O_2}^B$ ,  $k_{AA}^*=k_{AA}\times[p_1TAM]$ ,  $k_{BB}^*=k_{BB}\times[p_1TAM]$ ,  $k_{AB}^*=k_{AB}\times[p_1TAM]$ ,  $R_{H^+}^A$ . In order to decrease a number of variables, the intrinsic spectral parameters,  $a_p(p_1TAM^{3-})$ ,  $a_p(p_1TAM^{4-})$ ,  $\Delta g$ ,  $T_A$ ,  $T_B$ , and G were first determined by least-squares fitting of the function  $F(\nu)$  to experimental FT EPR spectra in anoxic solutions at low radical and buffer concentrations when spin and proton exchange contributions are negligible, i.e.  $R_{O_2}^A$ ,  $R_{O_2}^B$ ,  $k_{AA}^*$ ,  $k_{BB}^*$ ,  $k_{AB}^*$ ,  $R_{H^+}^A \ll 1/T_A$ ,  $1/T_B$ . The fitting FT EPR spectra of anoxic 150 mM NaCl solution of 50  $\mu$ M  $p_1TAM$  by eq. (1) yields the values  $a_p(p_1TAM^{3-})=10191$  kHz,  $1/T_A = 46$  kHz and  $G_A=85$  kHz for the spectrum acquired at pH 4.5; and  $a_p(p_1TAM^{4-})=9422$  kHz,  $1/T_B=32$  kHz and  $G_B=94$  kHz for the spectrum acquired at pH 11.0. For the spectra acquired at intermediate value of pH=6.9, when both ionization states of the radical are observed in the spectra, an average value of G (89 kHz) has been fixed during the spectra fitting yielding  $\Delta g =90$  kHz,  $1/T_A = 44$  kHz,  $1/T_B = 35$  kHz. These parameters have been used in all further calibrations of the spectra sensitivity to oxygen, probe and buffer concentrations.

#### Determination of bimolecular rate constants of spin self-exchange for $p_1TAM$ probe.

Least-square fitting of FT-EPR spectra of  $p_1TAM$  at concentration 0.1-2 mM by eq. (9) was performed using the fixed values of intrinsic spectral parameters pre-determined at low probe concentration as discussed above. The fitting yields the values of  $k_{AA}^*$ ,  $k_{BB}^*$  and  $k_{AB}^*$  which show linear dependence on  $p_1TAM$  concentration (see Fig. S12). The determined bimolecular rate constants,  $k_{AA}=14.3$  kHz/mM= $1.43\times 10^7$   $M^{-1}s^{-1}$ ,  $k_{BB}=7.4$  kHz/mM= $0.74\times 10^7$   $M^{-1}s^{-1}$ , and  $k_{AB}=10$  kHz/mM= $10^7$   $M^{-1}s^{-1}$ , are about three orders of magnitude lower than the rate constants for the diffusion-controlled reaction which is expected for sterically-hindered trityl radicals.

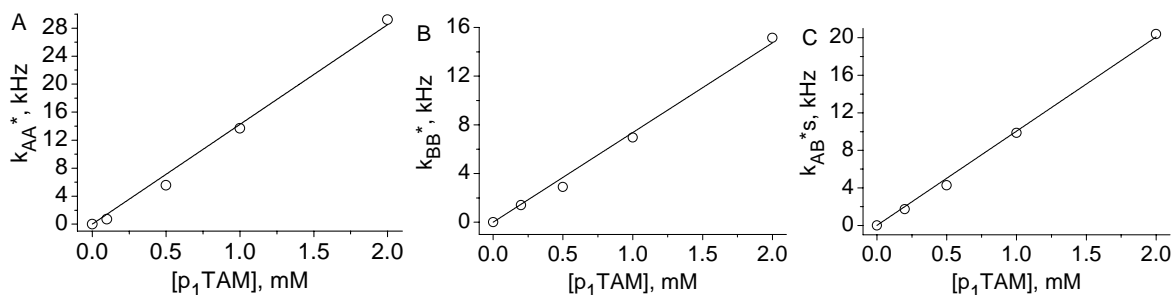

**Figure S12.** A. The concentration dependencies of the observed rates of spin self-exchange,  $k_{AA}^*$ ,  $k_{BB}^*$  and  $k_{AB}^*$  calculated from the spectra measured in 150 mM NaCl aqueous solutions of  $p_1TAM$  at pH 4.5 (A), 11.0 (B) and 6.9 (C). The spectra simulations were performed using  $1/T_A=44$  kHz,  $1/T_B=35$  kHz and  $G=89$  kHz. The linear fits yield the values of  $k_{AA}=14.3$  kHz/mM;  $k_{BB}=7.4$  kHz/mM, and  $k_{AB}=10$  kHz/mM.

**Determination of bimolecular rate constants of proton exchange of p<sub>1</sub>TAM probe with phosphate.**

The reaction of proton exchange between phosphate buffer and p<sub>1</sub>TAM probe can be expressed by following equation:

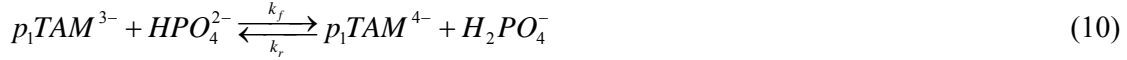

The rate of proton loss by p<sub>1</sub>TAM<sup>3-</sup> due to the proton transfer to HPO<sub>4</sub><sup>2-</sup> equals to

$$R_{H^+}^A = k_f \cdot [HPO_4^{2-}] = k_f \cdot B_0 \cdot \frac{K_a^B}{H^+ + K_a^B} = k_f \cdot B_0 \cdot \left( \frac{K_a^R}{K_a^B} \cdot \frac{p_A}{1 - p_A} + 1 \right) \quad (11)$$

Where B<sub>0</sub> is a total concentration of phosphate buffer, K<sub>a</sub><sup>B</sup> and K<sub>a</sub><sup>R</sup> are ionization constants for inorganic phosphate and phosphono group of p<sub>1</sub>TAM, correspondingly. Therefore the rate constant k<sub>f</sub> can be found by linear approximation of dependence of R<sub>H<sup>+</sup></sub><sup>A</sup> on buffer concentration, B<sub>0</sub>, measured at fixed pH value. The value of k<sub>r</sub> can be calculated from k<sub>f</sub> according to the following equation:

$$k_r = k_f \cdot \frac{[p_1TAM^{3-}] \cdot [HPO_4^{2-}]}{[p_1TAM^{4-}] \cdot [H_2PO_4^-]} = k_f \cdot \frac{K_a^B}{K_a^R} \quad (12)$$

that provides simple relationship, k<sub>r</sub>=1.55×k<sub>f</sub>, for aqueous solutions with ionic strength 0.15 (150 mM NaCl) and temperature 22 °C (pK<sub>a</sub><sup>B</sup> = 6.66<sup>[3]</sup> and pK<sub>a</sub><sup>R</sup> = 6.85<sup>[1]</sup>, see Fig.3a, main manuscript). Fitting the EPR spectra of p<sub>1</sub>TAM (200 μM) at different concentrations of phosphate buffer and fixed pH value close to pK<sub>a</sub><sup>R</sup> using the values of 1/T<sub>A</sub> = 44 kHz, 1/T<sub>B</sub> = 35 kHz, G = 89 kHz, k<sub>AA</sub> = 14.3 kHz/mM, k<sub>BB</sub> = 7.2 kHz/mM and k<sub>AB</sub> = 10 kHz/mM yields corresponding R<sub>H<sup>+</sup></sub><sup>A</sup> values. The linear approximation of R<sub>H<sup>+</sup></sub><sup>A</sup> dependence on phosphate concentration (Fig. 6a, main manuscript) in the range from 0 to 20 mM allows for calculation of bimolecular rate constants, k<sub>f</sub>=21 kHz/mM=2.1×10<sup>7</sup> M<sup>-1</sup>s<sup>-1</sup> and k<sub>r</sub> =33 kHz/mM=3.3×10<sup>7</sup> M<sup>-1</sup>s<sup>-1</sup>. At high phosphate buffer concentration (Fig. 4, main manuscript) proton exchange results in fast frequency exchange-induced line narrowing. At 90 mM phosphate, simulation of exchange-narrowed line still allows for evaluation of bimolecular rate constant, k<sub>f</sub>≈25 kHz/mM. The obtained values of k<sub>f</sub>=2.1×10<sup>7</sup> M<sup>-1</sup>s<sup>-1</sup> and k<sub>r</sub>=3.3×10<sup>7</sup> M<sup>-1</sup>s<sup>-1</sup> are 2-3 fold higher than corresponding values of spin self-exchange between ionization states of the trityl probe, k<sub>AA</sub>, k<sub>BB</sub> and k<sub>AB</sub>, which might reflect a difference in the sizes of the large trityl and comparatively small phosphate molecules.

***Simulation of spectra acquired with selective microwave pulse.***

In case of selective 96 ns π/2 pulse only the part of FT-EPR spectrum of p<sub>1</sub>TAM, low-field component of the doublet arisen from phosphorus hyperfine splitting, was acquired. The FT-EPR spectra were simulated as described above, but only low-field part were fitted to the

experimental spectra. First, FT-EPR spectra of anoxic solution of 50  $\mu\text{M}$  p<sub>1</sub>TAM were used to determine Lorentzian ( $1/T_A$  and  $1/T_B$ ) and Gaussian ( $G_A$  and  $G_B$ ) linewidths. The obtained values,  $1/T_A=46$  kHz and  $1/T_B=32$  kHz coincide within experimental error with the corresponding values measured using non-selective 96 ns  $\pi/2$  pulse. The obtained values of  $G_A=72$  kHz and  $G_B=85$  kHz were slightly lower than corresponding values measured using non-selective pulse. In the following simulations of the FT spectra obtained using selective pulse, an average value of  $G$  (79 kHz) was used.

#### **Determination of the rate constants of spin exchange of p<sub>1</sub>TAM with oxygen.**

FT-EPR spectra were acquired using selective pulse experiment mode at different oxygen partial tensions and three pH values: pH 11 ( $\text{pH} \gg \text{p}K_a$ ), pH 4.5 ( $\text{pH} \ll \text{p}K_a$ ) and pH 6.9 ( $\text{pH} \approx \text{p}K_a$ ). Least-square fitting of FT-EPR spectra using  $1/T_A=46$  kHz,  $1/T_B=32$  kHz and  $G=79$  kHz yield the values of oxygen-induced relaxation rates,  $R_{O_2}^A$  and  $R_{O_2}^B$ . The linear fitting of the dependencies of  $R_{O_2}^A$  and  $R_{O_2}^B$  on oxygen partial pressure yields the corresponding bimolecular rate constants,  $k_{O_2}^A = 1.51$  kHz/mmHg and  $k_{O_2}^B = 1.38$  kHz/mmHg (see Figure 3b, manuscript). Supposing oxygen solubility in aqueous solution with 150 mM NaCl at 22 °C and  $p_{O_2}=760$  mmHg,  $\approx 1.28$  mM, we get the values of  $k_{O_2}^A = 0.9 \times 10^9 \text{ M}^{-1}\text{s}^{-1}$  and  $k_{O_2}^B = 0.82 \times 10^9 \text{ M}^{-1}\text{s}^{-1}$  being close to rate constants for diffusion-controlled reactions.

#### ***FT-EPR spectra of p<sub>1</sub>TAM probe solutions of different compositions***

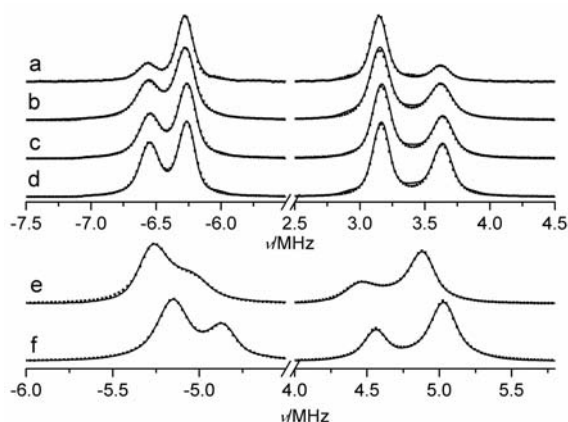

**Figure S13.** FT-EPR spectra of p<sub>1</sub>TAM probe solutions of different composition shown in Table 2 (the order of the spectra from a to f corresponds to the order of rows from top to bottom in the Table 2). The dotted lines represent the best fit of the calculated spectra yielding the parameters of pH,  $p_{O_2}$  and concentrations of phosphate and p<sub>1</sub>TAM shown in Table 2 (main manuscript).



## ***References:***

- [1] I. Dhimitruka, A. A. Bobko, T. D. Eubank, D. A. Komarov, V. V. Khramtsov, *JACS* **2013**, *135*, 5904–5910.
- [2] M. L. Martin, G. J. Martin, J.-J. Delpuech, *Practical NMR spectroscopy*, Heyden, London; Philadelphia, **1980**.
- [3] J. N. Butler, *Ionic equilibrium: solubility and pH calculations*, Wiley, New York, **1998**.
